# Supplementary material for: Moabite, NiFe3+(PO4)O, a new natural oxyphosphate
Source: Copernicus journal article supplement (doi:10.5194/ejm-37-353-2025), 2025-06-17
Supplement: Supplementary file 2 [file ejm-37-353-2025-supplement.zip]

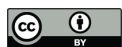

*Supplement of*

**Moabite,  $\text{NiFe}^{3+}(\text{PO}_4)\text{O}$ , a new natural oxyphosphate**

**Sergey N. Britvin et al.**

*Correspondence to:* Sergey N. Britvin ([sergei.britvin@spbu.ru](mailto:sergei.britvin@spbu.ru))

- [ejm-37-353-2025-supplement-title-page.pdf](#)
- [Moabite.cif](#)
- [Moabite\\_checkcif.pdf](#)

The copyright of individual parts of the supplement might differ from the article licence.
